# Supplementary material
Source: PubMed Central journal article supplement (PMC5754222)
Supplement: NIHMS920160-supplement-1.pdf [file NIHMS920160-supplement-1.pdf]

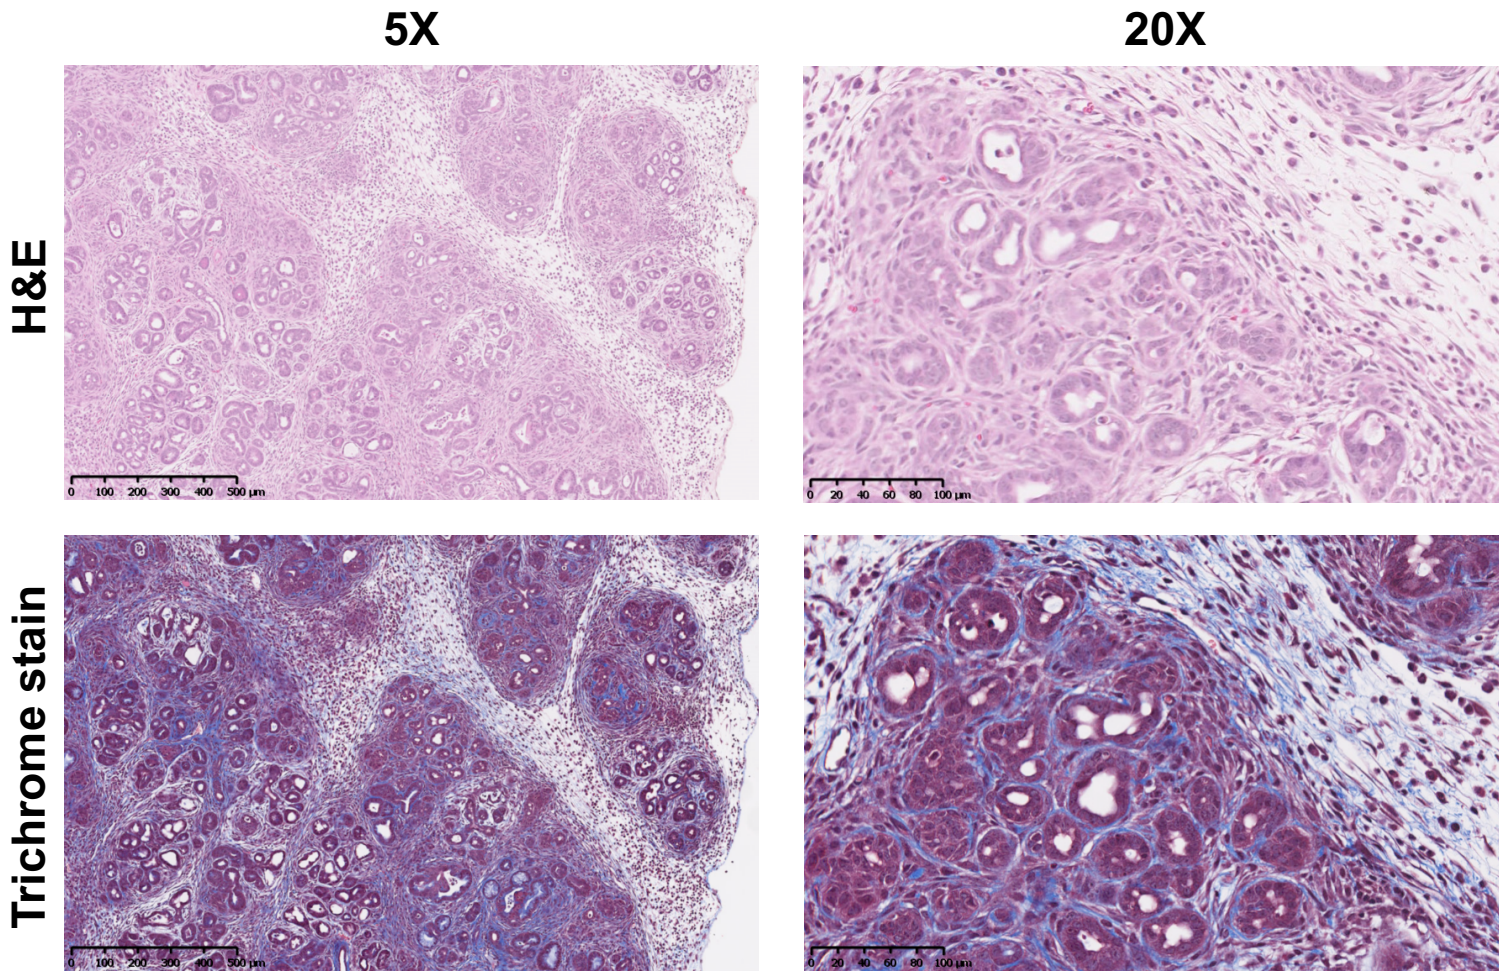

**Supplementary Figure 1.** Hematoxylin and eosin (H&E) stain and trichrome stain of representative 7-week-old *KIC* tumor.

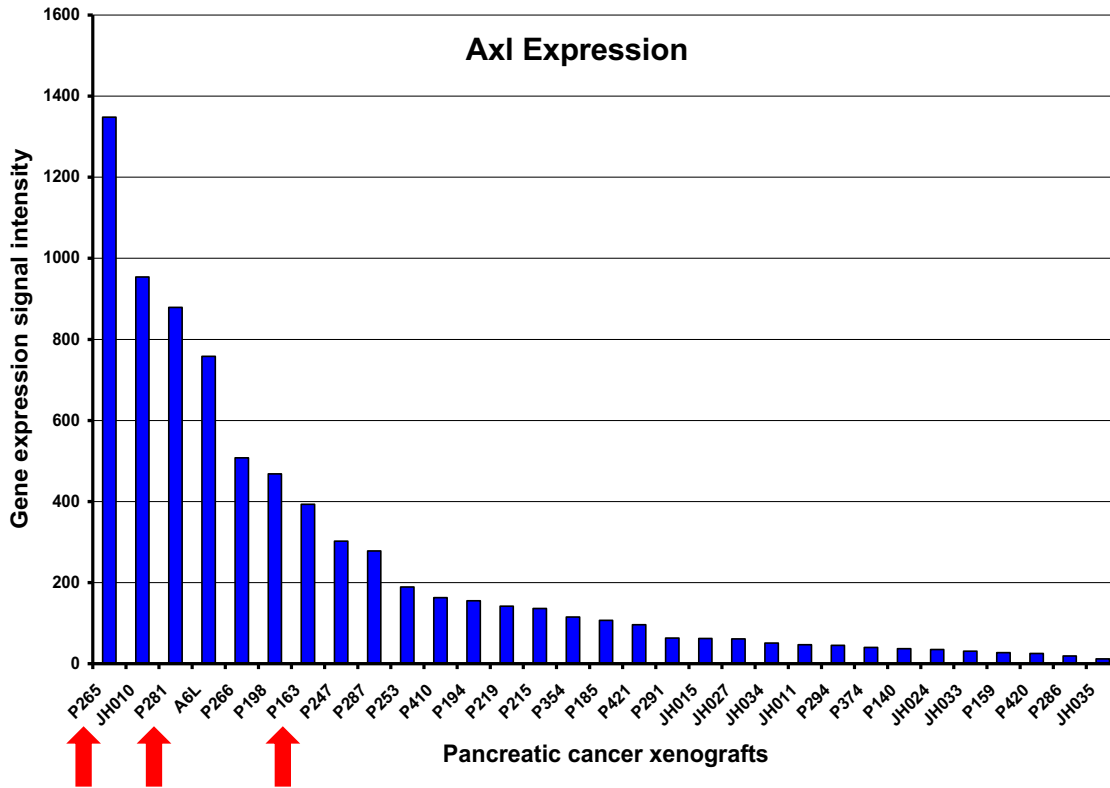

**Supplementary Figure 2.** Axl gene expression in pancreatic cancer patient-derived xenografts (PDX). RNA isolated from baseline (untreated) tumors was profiled using Affymetrix U133 Plus 2.0 gene arrays.

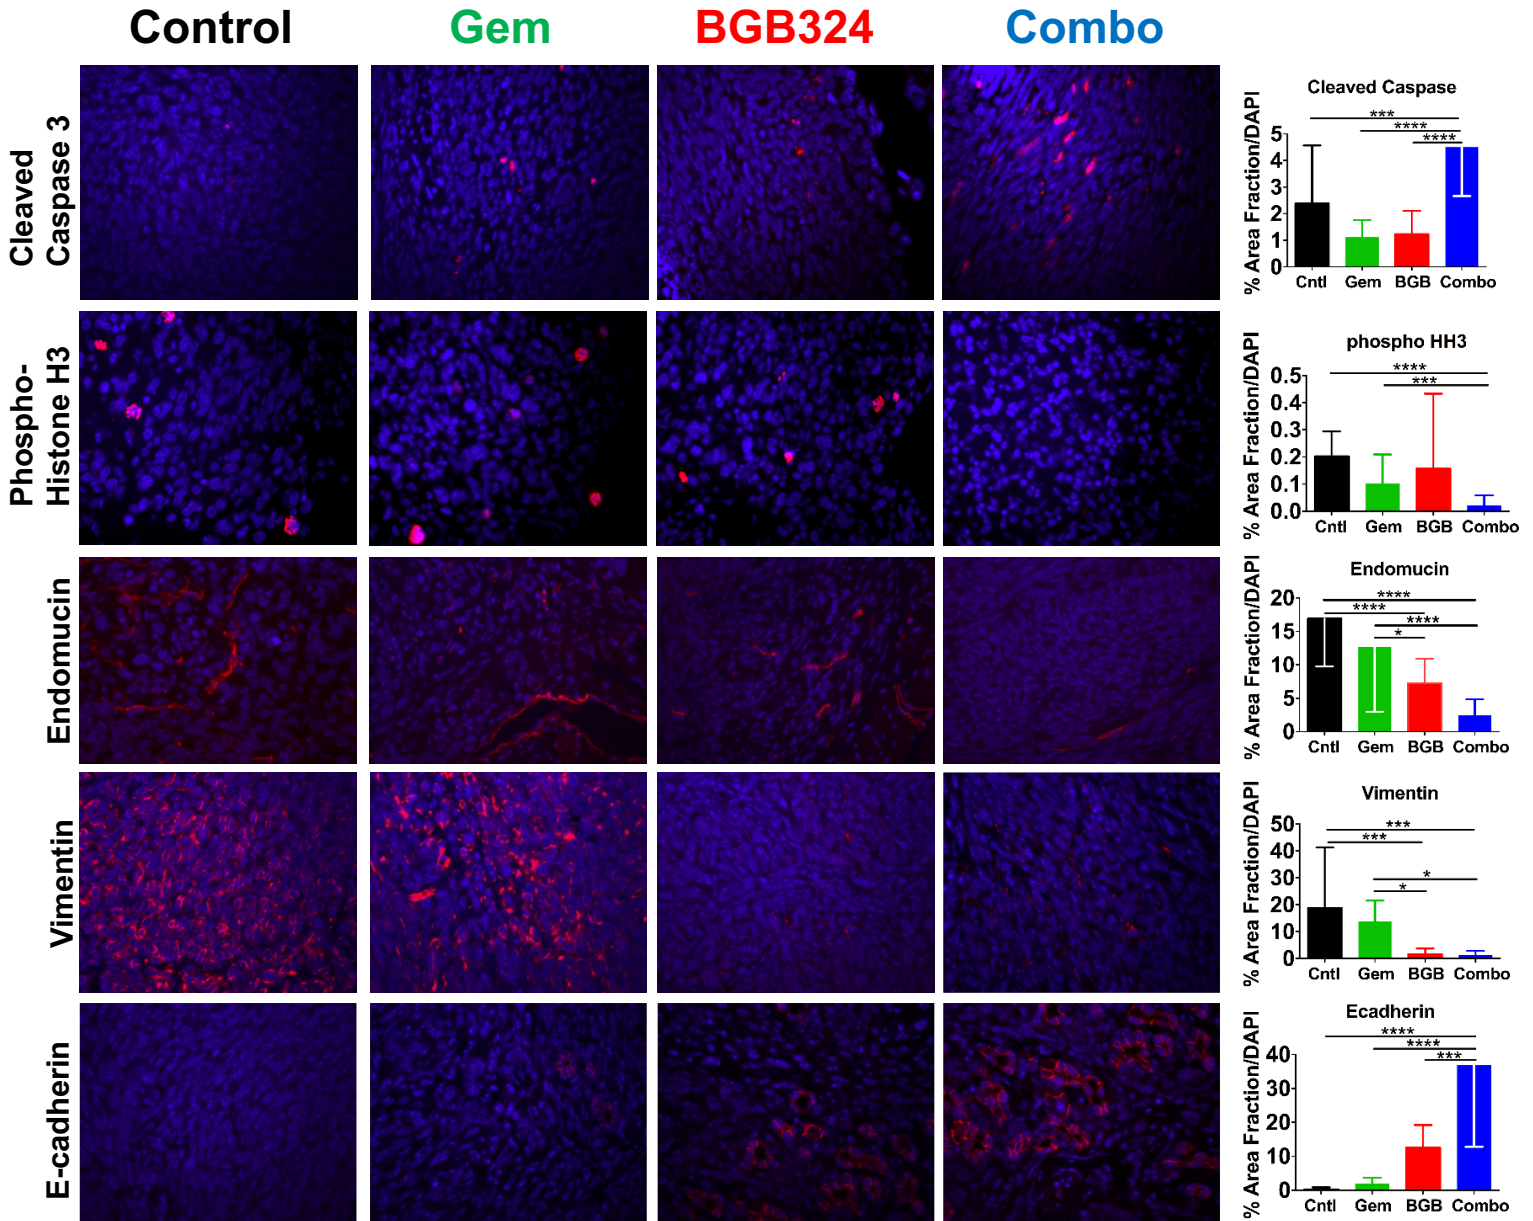

**Supplementary Figure 3.** Pan02 tumor tissue from mice treated as described in Figure 2 was evaluated by immunofluorescence for cleaved-caspase 3, phospho-histone-3, endomucin, E-cadherin, and vimentin. Images were analyzed using Elements software; quantification of % area fraction is shown. Data are displayed as mean  $\pm$  SD and represent 5 images per tumor with 4 animals per group analyzed. \* $P < 0.05$ ; \*\*\* $P < 0.005$ ; \*\*\*\* $P < 0.001$ ; by ANOVA with Tukey's MCT.

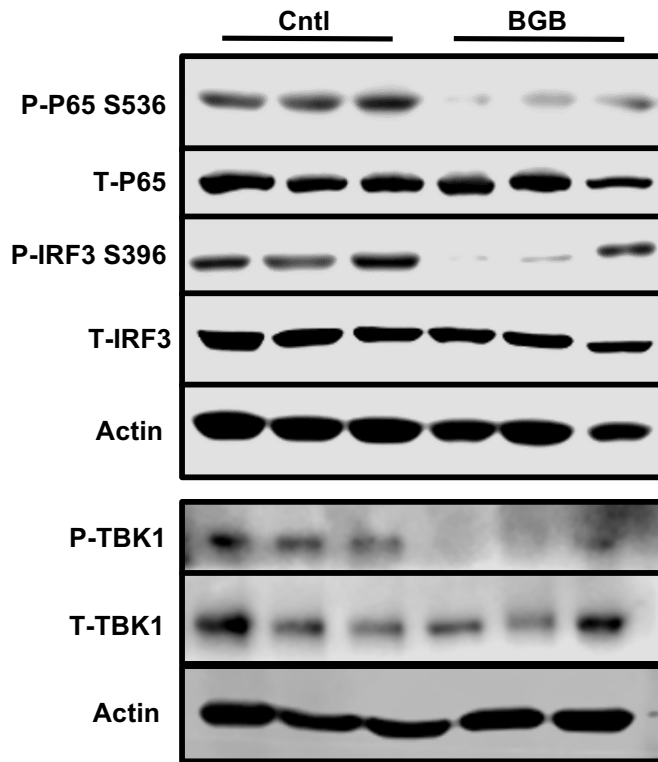

**Supplementary Figure 4.** Tumor lysates from *K/C* animals with 2-week treatment of BGB324 (50 mg/kg PO BID, or vehicle (Cntl) were probed for the level of active TBK1 and NF-κB by Western blotting for the indicated targets.

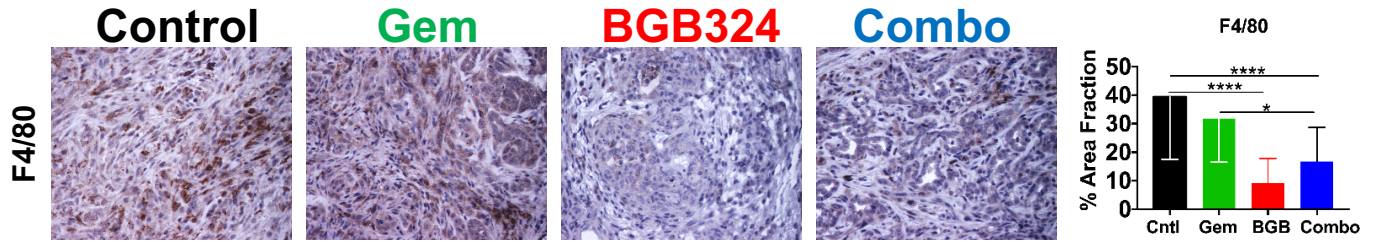

**Supplementary Figure 5.** Pan02 pancreatic tissue was stained for F4/80. Images were analyzed using Elements software; quantification of % area fraction is shown. Data are displayed as mean  $\pm$  SD and represent 5 images per tumor with 4 animals per group analyzed. \* $P < 0.05$ ; \*\*\*\* $P < 0.001$ ; by ANOVA with Tukey's MCT.

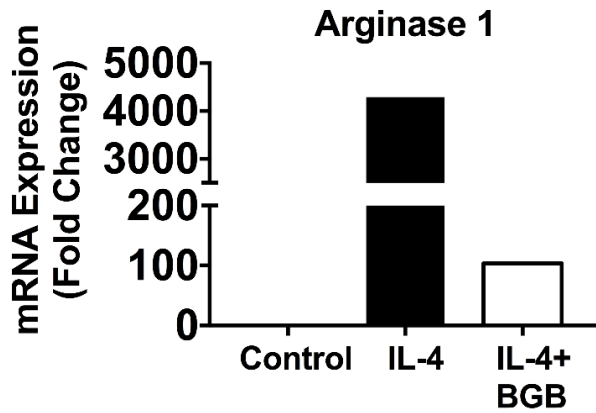

**Supplementary Figure 6.** The mRNA expression level of Arginase 1 was determined by q-PCR in control, IL-4, and IL-4 + BGB324-treated bone marrow-derived macrophages. Bone marrow-derived macrophages were isolated from C57BL/6J mice and stimulated with control (0.02% DMSO in media), IL-4 (40 ng/ml), or IL-4 (40 ng/ml) + BGB324 (2  $\mu$ M) for 18 hours.

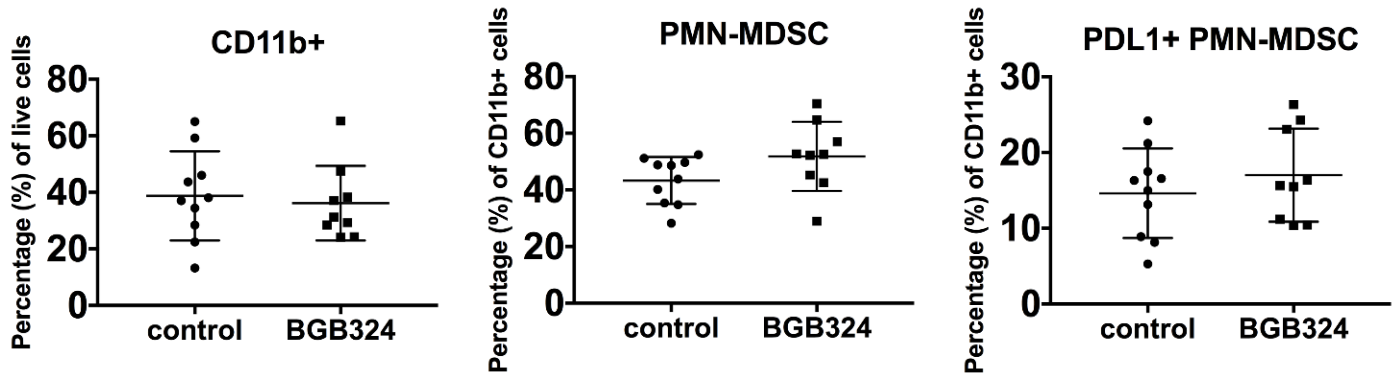

**Supplementary Figure 7.** Flow cytometry of KPC-M09 subcutaneous tumors treated with vehicle (control) or BGB324 (50 mg/kg, PO, BID) for two weeks as described in the supplementary methods. BGB324 didn't alter CD11b+ cells PMN-MDSCs (CD11b<sup>+</sup> Ly6G<sup>+</sup> Ly6C<sup>+</sup>), and PD-L1<sup>+</sup> PMN-MDSCs,

Supplementary Table 1: Cytokine/Chemokine Concentration (pg/ml) in *KIC* tumor lysates from different treatment groups

|                                 | <b>Cntl</b> | <b>Gem</b> | <b>BGB</b> | <b>Combo</b> |
|---------------------------------|-------------|------------|------------|--------------|
| <b>G-CSF</b>                    | 394         | 196.68     | 167        | 298.5        |
| <b>GM-CSF</b>                   | 261.5       | 330        | 232.5      | 273.5        |
| <b>IFN<math>\gamma</math></b>   | 61.025      | 69.78      | 47.655     | 43.615       |
| <b>IL-1<math>\alpha</math></b>  | 289.5       | 309        | 228.5      | 217.5        |
| <b>IL-2</b>                     | 20.98       | 21.035     | 17.345     | 25.145       |
| <b>IL-3</b>                     | 3.85        | 2.46       | 1.58       | 1.375        |
| <b>IL-4</b>                     | 3.565       | 1.84       | 1.725      | 1.655        |
| <b>IL-5</b>                     | 8.515       | 5.66       | 4.945      | 2.23         |
| <b>IL-9</b>                     | 1361        | 579        | 880.5      | 1314         |
| <b>IL-10</b>                    | 29.44       | 12.68      | 28.84      | 13.055       |
| <b>IL-12_p40</b>                | 203.5       | 158        | 145        | 141          |
| <b>IL-12_p70</b>                | 20.345      | 0          | 3.96       | 1.995        |
| <b>IL-13</b>                    | 15.1        | 3.48       | 0          | 0            |
| <b>IL-15</b>                    | 50.91       | 21.29      | 18.12      | 20.835       |
| <b>IL-17</b>                    | 14.42       | 7.02       | 6.555      | 9.03         |
| <b>IP-10</b>                    | 48.005      | 105.06     | 32.36      | 30.88        |
| <b>KC</b>                       | 270         | 283        | 131.93     | 228.5        |
| <b>LIF</b>                      | 182         | 285        | 150.5      | 133.5        |
| <b>LIX</b>                      | 34.815      | 1.74       | 0          | 0            |
| <b>MCP-1</b>                    | 319.5       | 257        | 185.29     | 135.5        |
| <b>M-CSF</b>                    | 25.37       | 10.97      | 12.275     | 8.225        |
| <b>MIG</b>                      | 66.38       | 60.73      | 13.85      | 27.085       |
| <b>MIP-1<math>\alpha</math></b> | 45.825      | 26.54      | 15.55      | 12.22        |
| <b>MIP-1<math>\beta</math></b>  | 12.43       | 33.27      | 3.49       | 0            |
| <b>MIP-2</b>                    | 309.5       | 89.44      | 120.16     | 30.625       |
| <b>RANTES</b>                   | 7.72        | 6.99       | 1.915      | 2.465        |
| <b>TNF-<math>\alpha</math></b>  | 11.135      | 5.835      | 7.855      | 4.945        |
| <b>VEGF</b>                     | 13.015      | 85.99      | 9.8        | 265.5        |

**Supplementary Table 1.** The concentration of cytokines and chemokines in *KIC* tumor lysates were tested by MILLIPLEX (Immunology Multiplex Assay, Millipore).
